# Supplementary material
Source: ML conference proceedings conference paper supplement (https://openaccess.thecvf.com/content/CVPR2023/html/Zhao_DNeRV_Modeling_Inherent_CVPR_2023_paper.html)
Supplement: Supplementary file 1 [file Zhao_DNeRV_Modeling_Inherent_CVPR_2023_supplemental.pdf]

## Appendix

### 7. Implementation Details

#### 7.1. Architecture of diff encoder

The strides in diff encoder depends on the resolution of input frame and the size of output diff embeddings, shown as Tab. 7.

| size of diff embeddings | resolution        | strides   |
|-------------------------|-------------------|-----------|
| $2 \times 40 \times 80$ | $640 \times 1280$ | (2,2,2,2) |
|                         | $480 \times 960$  | (3,2,2)   |
|                         | $960 \times 1920$ | (4,3,2)   |
| $2 \times 10 \times 20$ | $960 \times 1920$ | (4,4,3,2) |

Table 7. Architecture of diff encoder.

#### 7.2. Architecture of decoder

The architecture of decoders with CCU in different size is given in Tab. 8.  $C_{init}$  is the initial channel width of embeddings before feeding to decoder stages. Once feeding the  $w_0 \times h_0 \times C_{init}$  embeddings into following stage, for example Stage 1 with stride  $s = 5$ , the size of output feature maps is  $5w_0 \times 5h_0 \times C_1$ , where  $C_1 = \lfloor C_{init}/r \rfloor$  is the output channel width of Stage 1,  $r = 1.2$  is the reduction rate for each stage and  $\lfloor x \rfloor$  is the round down operator.  $K_c$  is the kernel size in CCU. The minimal and maximal kernel size in different decoder stages are 1 and 5, follow the setting in [3].

| resolution        | size | $C_0$ | $C_{init}$ | $C_1$ | $C_5$ | strides     | $K_c$ |
|-------------------|------|-------|------------|-------|-------|-------------|-------|
| $640 \times 1280$ | 0.35 | 16    | 32         | 26    | 11    | (5,4,4,2,2) | 3     |
|                   | 0.75 | 16    | 48         | 40    | 18    | (5,4,4,2,2) | 3     |
|                   | 1.5  | 16    | 68         | 56    | 25    | (5,4,4,2,2) | 3     |
|                   | 3    | 16    | 95         | 79    | 37    | (5,4,4,2,2) | 3     |
| $480 \times 960$  | 3    | 16    | 110        | 91    | 42    | (5,4,3,2,2) | 1     |
| $960 \times 1920$ | 1.58 | 16    | 68         | 56    | 25    | (5,4,4,3,2) | 1     |
|                   | 3    | 16    | 92         | 76    | 35    | (5,4,4,3,2) | 1     |

Table 8. Architecture of decoder and CCU.

#### 7.3. Experimental Details

In video compression, the network structure would be adjusted for different sizes and bpp, 1.58M with diff embedding in  $2 \times 10 \times 20$  for 0.0146 bpp, 3M with diff embedding in  $2 \times 10 \times 20$  for 0.0257 bpp and 3M with diff embedding in  $2 \times 40 \times 80$  for 0.0517 bpp.

### 8. Additional quantitative results

#### 8.1. Comparison for video interpolation on DAVIS Dynamic

Interpolation results between different methods on DAVIS Dynamic are shown in Tab. 12. We only compare

DNeRV with hybrid-based implicit methods [3] because HNeRV is the current best implicit method for video representation.

#### 8.2. The effects of different compression techniques

Ablations for various compression technique on UVG is given in Tab. 11. In future work, more advanced model compression methods would be used on the NeRV methods owing to the fewer redundance in the weights.

#### 8.3. The effects of different compression techniques

For the evaluation of video compression, the results of VMAF [32] are demonstrated in Tab. 9.

| Bpp   | Beauty | Bospho | Honey | Jockey | Ready | Shake | Yacht | avg.  |
|-------|--------|--------|-------|--------|-------|-------|-------|-------|
| 0.015 | 77.74  | 71.43  | 93.71 | 68.02  | 53.55 | 80.74 | 57.55 | 71.82 |
| 0.025 | 83.78  | 78.18  | 93.16 | 75.38  | 60.97 | 82.53 | 63.45 | 76.78 |
| 0.05  | 85.15  | 77.45  | 94.22 | 84.02  | 67.47 | 86.13 | 60.09 | 79.22 |

Table 9. Number of VMAF on  $960 \times 1920$  UVG in different Bpp.

#### 8.4. Ablation results for optimizer

Results for optimizer ablations on Bunny with 0.35M size and 300 epochs is given in Tab. 10. Adan [50] is much more effective than Adam for larger learning rate.

### 9. Additional qualitative results

#### 9.1. Visualization of video interpolation on UVG

Additional interpolation comparison on UVG is given in Fig. 8 and Fig. 9.

“Jockey” and “ReadySetGo” are two typical videos with large motion and dynamic scenes from UVG. In Fig. 8 and Fig. 9, we could find that the interpolations generated by DNeRV are obviously better than HNeRV. Some subtle spatial structures in interpolations of DNeRV, such as numbers on the screen or flagpole in the distance, remain nearly constant between adjacent frames.

#### 9.2. Visualization of video interpolation on DAVIS Dynamic

Additional interpolation comparison on DAVIS Dynamic is given in Fig. 10, Fig. 11, Fig. 12 and Fig. 13.

DAVIS Dynamic is more difficult than UVG by reason of more dynamic scene changing and fewer frames. Although DNeRV outperforms HNeRV achieving the best results of implicit methods, but there is still much room for improvement. Once increasing the parameter quantity and utilizing task-specific modification, DNeRV could be competitive with state-of-the-art deep interpolation methods.

| learning rate | optimizer | 50          | 100         | 150         | 200         | 250         | 300         |
|---------------|-----------|-------------|-------------|-------------|-------------|-------------|-------------|
| 5e-4          | Adam      | 24.97/0.769 | 27.86/0.873 | 28.99/0.905 | 30.10/0.920 | 30.66/0.926 | 30.80/0.927 |
|               | Adan      | 24.17/0.734 | 26.42/0.823 | 27.65/0.862 | 28.41/0.881 | 28.80/0.890 | 28.91/0.893 |
| 1e-3          | Adam      | 26.36/0.829 | 24.67/0.776 | 27.06/0.841 | 27.71/0.863 | 28.46/0.876 | 28.56/0.878 |
|               | Adan      | 25.53/0.789 | 28.23/0.879 | 29.31/0.905 | 30.03/0.917 | 30.40/0.922 | 30.50/0.924 |
| 3e-3          | Adam      | 18.39/0.519 | 18.81/0.548 | 19.31/0.584 | 19.18/0.583 | 19.32/0.591 | 19.36/0.594 |
|               | Adan      | 27.59/0.865 | 29.76/0.918 | 30.59/0.933 | 31.35/0.941 | 31.78/0.944 | 31.89/0.946 |

Table 10. Optimizer ablations on Bunny in PSNR/SSIM.

| UVG                         | Beauty      | Bospho      | Honey       | Jockey      | Ready       | Shake       | Yacht       |
|-----------------------------|-------------|-------------|-------------|-------------|-------------|-------------|-------------|
| N/A                         | 40.00/0.972 | 36.67/0.965 | 41.92/0.993 | 35.75/0.947 | 28.68/0.917 | 36.53/0.962 | 31.10/0.924 |
| 8-bit Quant                 | 39.97/0.972 | 36.64/0.965 | 41.20/0.993 | 35.73/0.947 | 28.66/0.916 | 36.35/0.961 | 31.00/0.923 |
| 8-bit Quant + Pruning (10%) | 39.38/0.971 | 36.41/0.964 | 39.95/0.991 | 35.50/0.946 | 28.55/0.915 | 35.42/0.959 | 30.78/0.921 |
| 8-bit Quant + Pruning (20%) | 33.72/0.961 | 34.56/0.957 | 34.47/0.978 | 32.25/0.938 | 27.63/0.905 | 28.66/0.943 | 28.84/0.908 |

Table 11. Compression ablations on UVG in PSNR/SSIM.

### 9.3. Visualization of video inpainting on DAVIS Dynamic

Additional inpainting comparison on DAVIS Dynamic is shown in Fig. 14, Fig. 15 and Fig. 16.

Due to diff stream and CCU, DNeRV could model different regions of the frame more robustly, reduce the influence of masked regions. Besides, one limitation of DNeRV is that it couldn't model the detail texture well, and we will improve it in the future work.

### 9.4. Visualization of optical flow and difference stream

We conducted additional experiments on Bunny, following the same setting as Tab. 1a. The PSNR results are 29.13, 29.25, 28.84, and 28.70 in dB for the model sizes of 0.35M, 0.75M, 1.5M, and 3M. The optical flow is computed using Gunner Farneback algorithm by opencv-python 4.5.3 and numpy 1.19.5.

The visualization comparison between optical flow and diff stream is shown in Fig. 7. It can be clearly observed that, although optical flow contains motion information, it loses huge other information in pixel domain. Saliency motion information in optical flow may be key in action recognition or motion prediction, but it cannot bring much help for pixel-level reconstruction tasks. For example, the fluctuation of grass or the change of skin brightness with the light may not help to recognize the rabbit's movements, but they are essential for reconstruction. Diff stream records all these information in unbiased way.

| Videos         | DNeRV              |             | HNeRV       |             |
|----------------|--------------------|-------------|-------------|-------------|
|                | test               | train       | test        | train       |
| Blackswan      | 23.89/0.712        | 28.98/0.874 | 21.67/0.589 | 28.76/0.865 |
| Bmx-bumps      | 22.34/0.696        | 25.96/0.784 | 19.24/0.549 | 30.32/0.883 |
| Camel          | 21.31/0.656        | 23.79/0.761 | 20.69/0.586 | 26.28/0.855 |
| Breakdance     | 22.28/0.858        | 27.26/0.937 | 20.40/0.841 | 29.53/0.958 |
| Car-round      | 20.42/0.725        | 28.91/0.931 | 16.92/0.560 | 28.23/0.919 |
| Bmx-trees      | 21.68/0.644        | 28.88/0.867 | 18.39/0.453 | 28.99/0.872 |
| Car-shadow     | 22.47/0.734        | 29.41/0.913 | 19.35/0.622 | 28.64/0.897 |
| Cows           | 20.89/0.629        | 25.24/0.837 | 20.45/0.590 | 24.71/0.815 |
| Dance-twirl    | 20.95/0.656        | 29.19/0.872 | 18.38/0.517 | 28.70/0.857 |
| Dog            | 24.91/0.683        | 29.55/0.857 | 21.99/0.457 | 29.85/0.868 |
| Car-turn       | 24.29/0.737        | 28.21/0.838 | 22.34/0.654 | 27.80/0.828 |
| Dog-agility    | 20.57/0.730        | 27.14/0.852 | 17.14/0.609 | 26.21/0.818 |
| Drift-straight | 19.11/0.645        | 29.75/0.921 | 15.62/0.354 | 29.72/0.916 |
| Drift-turn     | 21.22/0.649        | 29.45/0.849 | 18.44/0.501 | 28.43/0.815 |
| Goat           | 20.46/0.554        | 28.63/0.908 | 18.22/0.327 | 27.69/0.891 |
| Libby          | 24.24/0.688        | 32.22/0.906 | 20.00/0.472 | 30.75/0.871 |
| Mallard-fly    | 21.81/0.610        | 28.25/0.809 | 19.23/0.397 | 27.26/0.788 |
| Mallard-water  | 21.24/0.687        | 27.55/0.882 | 17.60/0.429 | 29.23/0.911 |
| Parkour        | 22.13/0.680        | 27.32/0.879 | 18.82/0.488 | 26.77/0.863 |
| Rollerblade    | 24.91/0.850        | 30.52/0.915 | 21.56/0.782 | 29.92/0.907 |
| Scooter-black  | 17.15/0.633        | 27.26/0.926 | 14.37/0.416 | 26.33/0.901 |
| Stroller       | 23.32/0.718        | 32.36/0.923 | 20.47/0.559 | 31.68/0.905 |
| Average        | <b>21.89/0.690</b> | 28.45/0.875 | 19.15/0.534 | 28.44/0.873 |

Table 12. Interpolation results on DAVIS Dynamic.

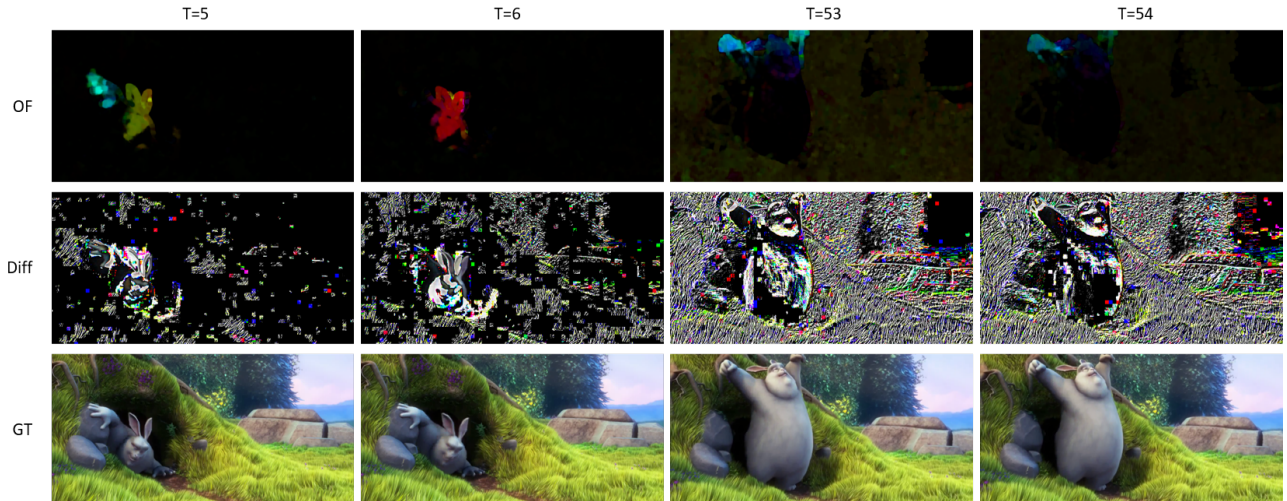

Figure 7. Comparison between optical flow and difference stream.



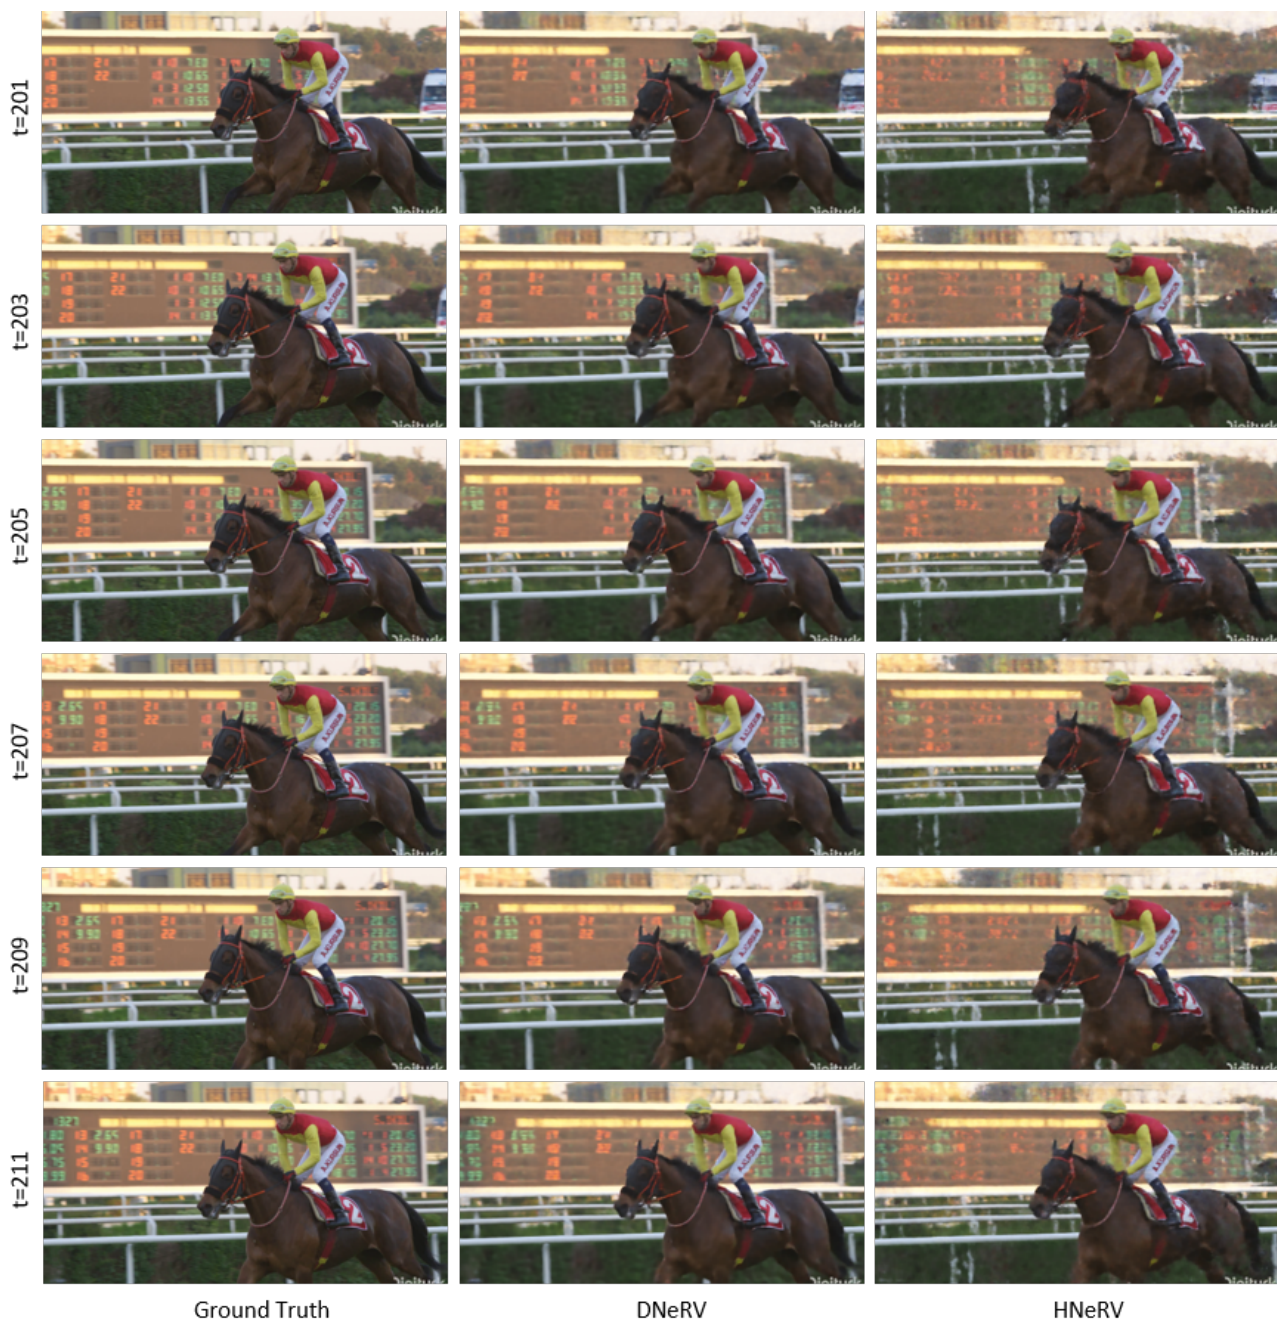

Figure 8. Additional examples for video interpolation on Jockey.



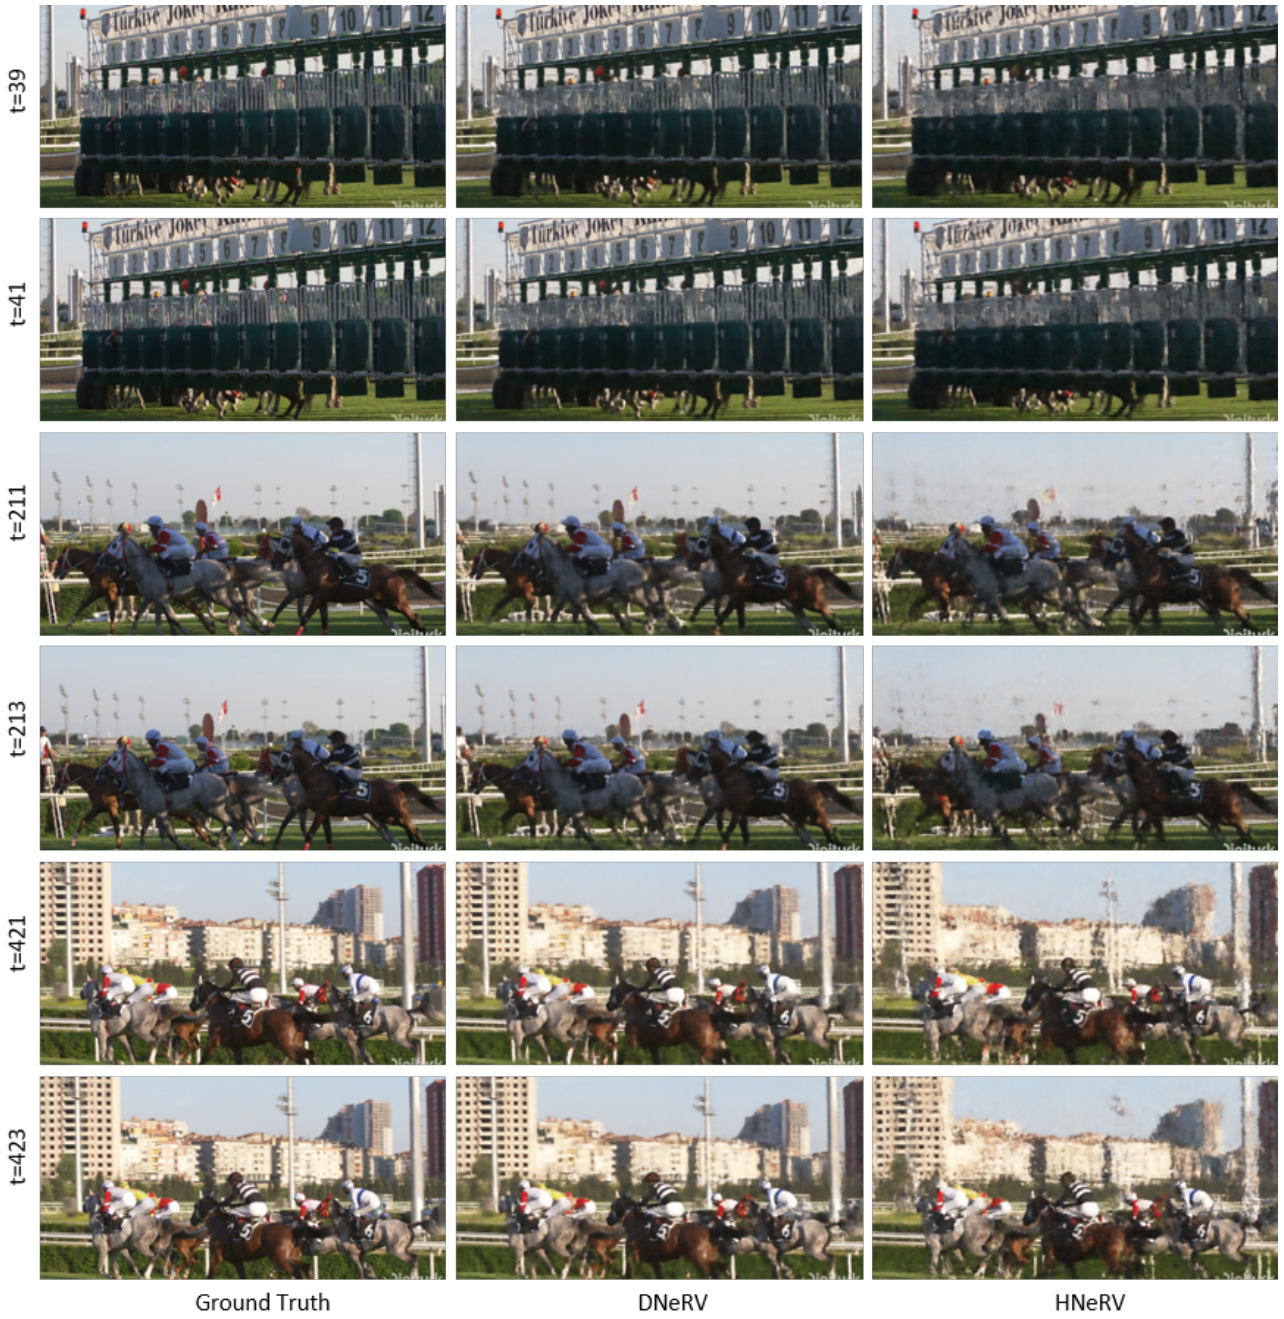

Figure 9. Additional examples for video interpolation on ReadySetGo.



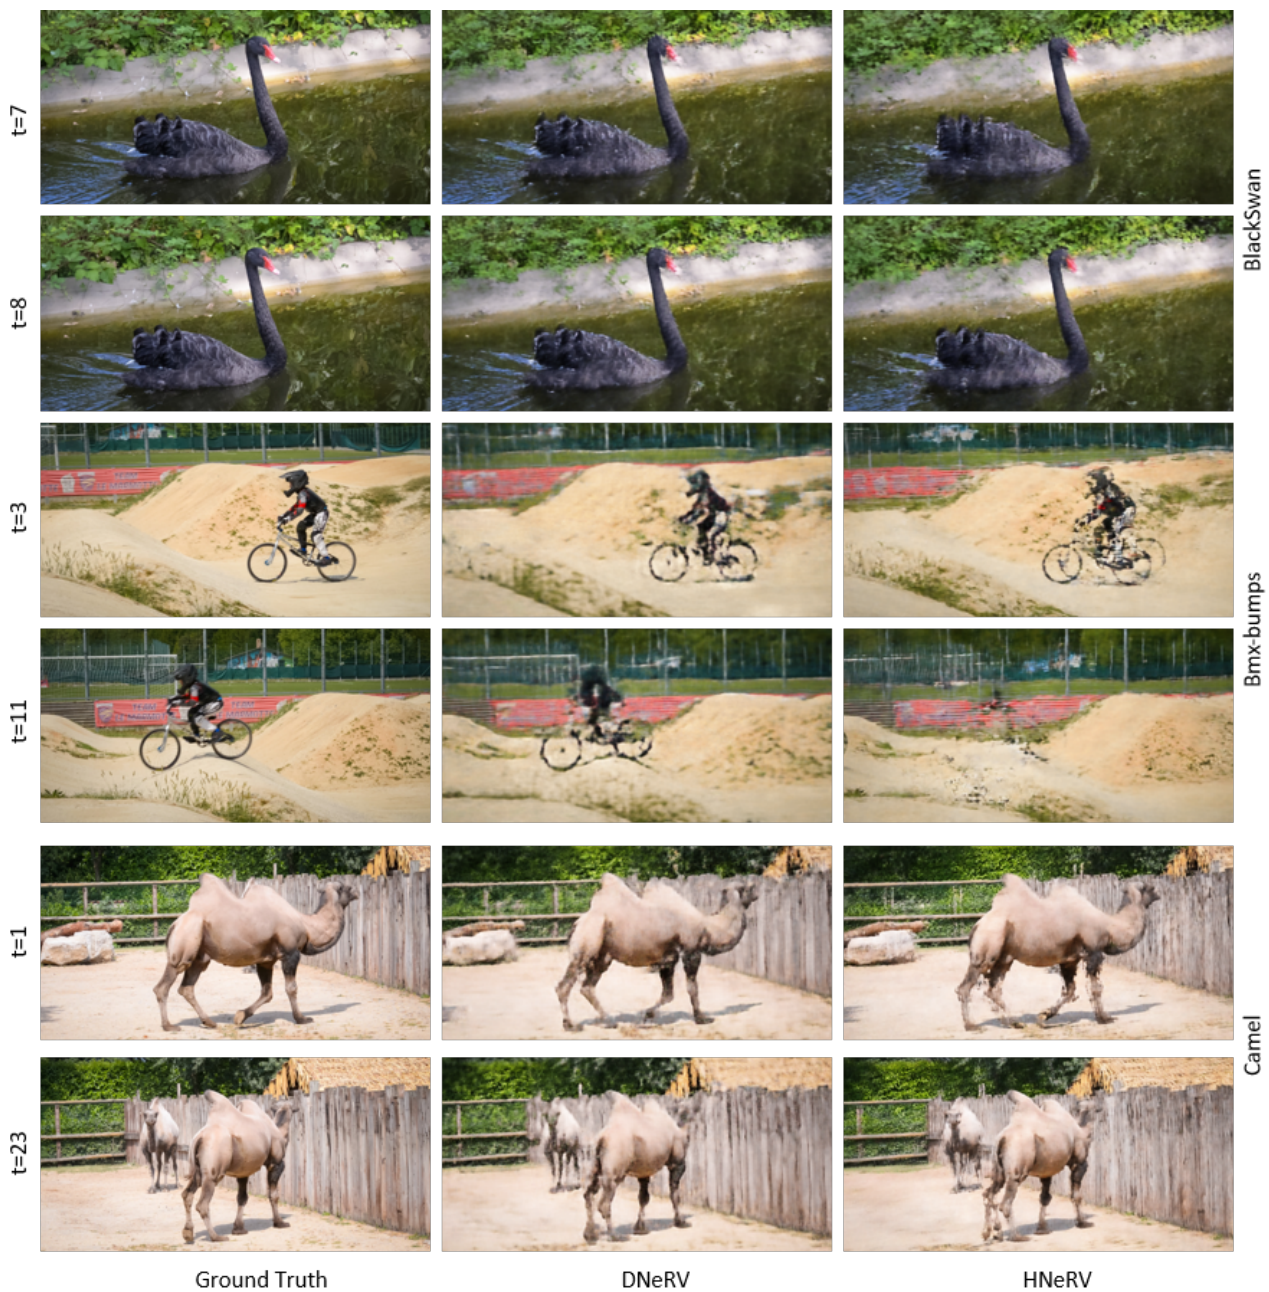

Figure 10. Additional examples for video interpolation on Blackswan, Bmx-bumps and Camel.

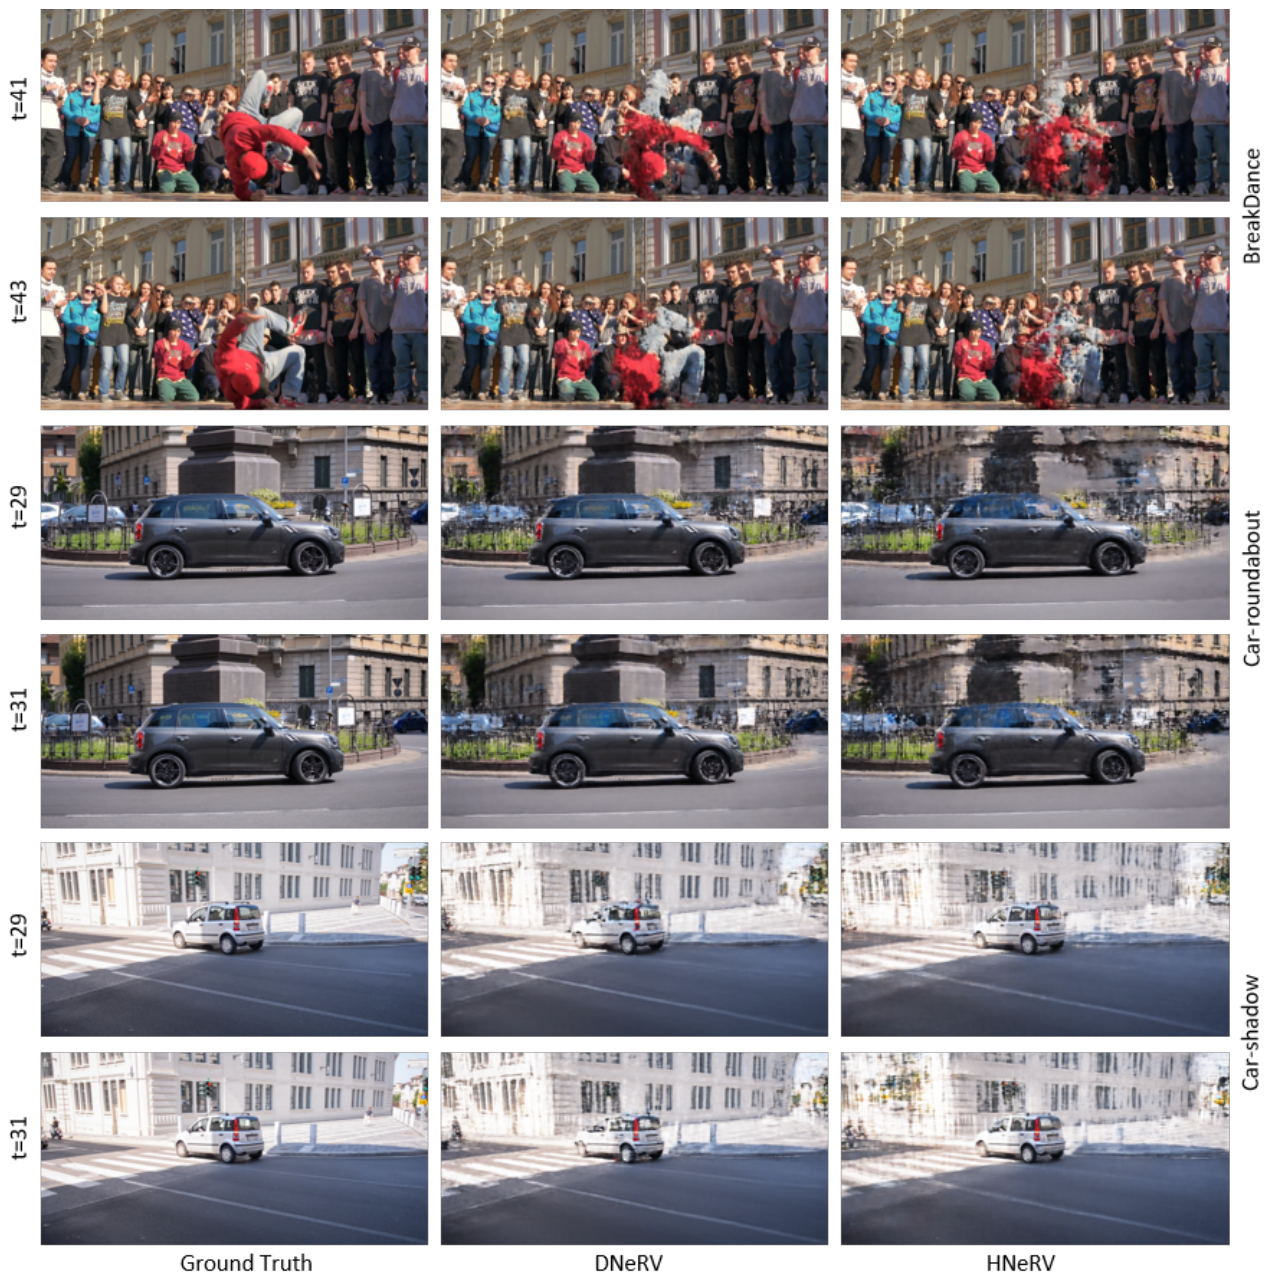

Figure 11. Additional examples for video interpolation on Breakdance, Car-roundabout and Car-shadow.



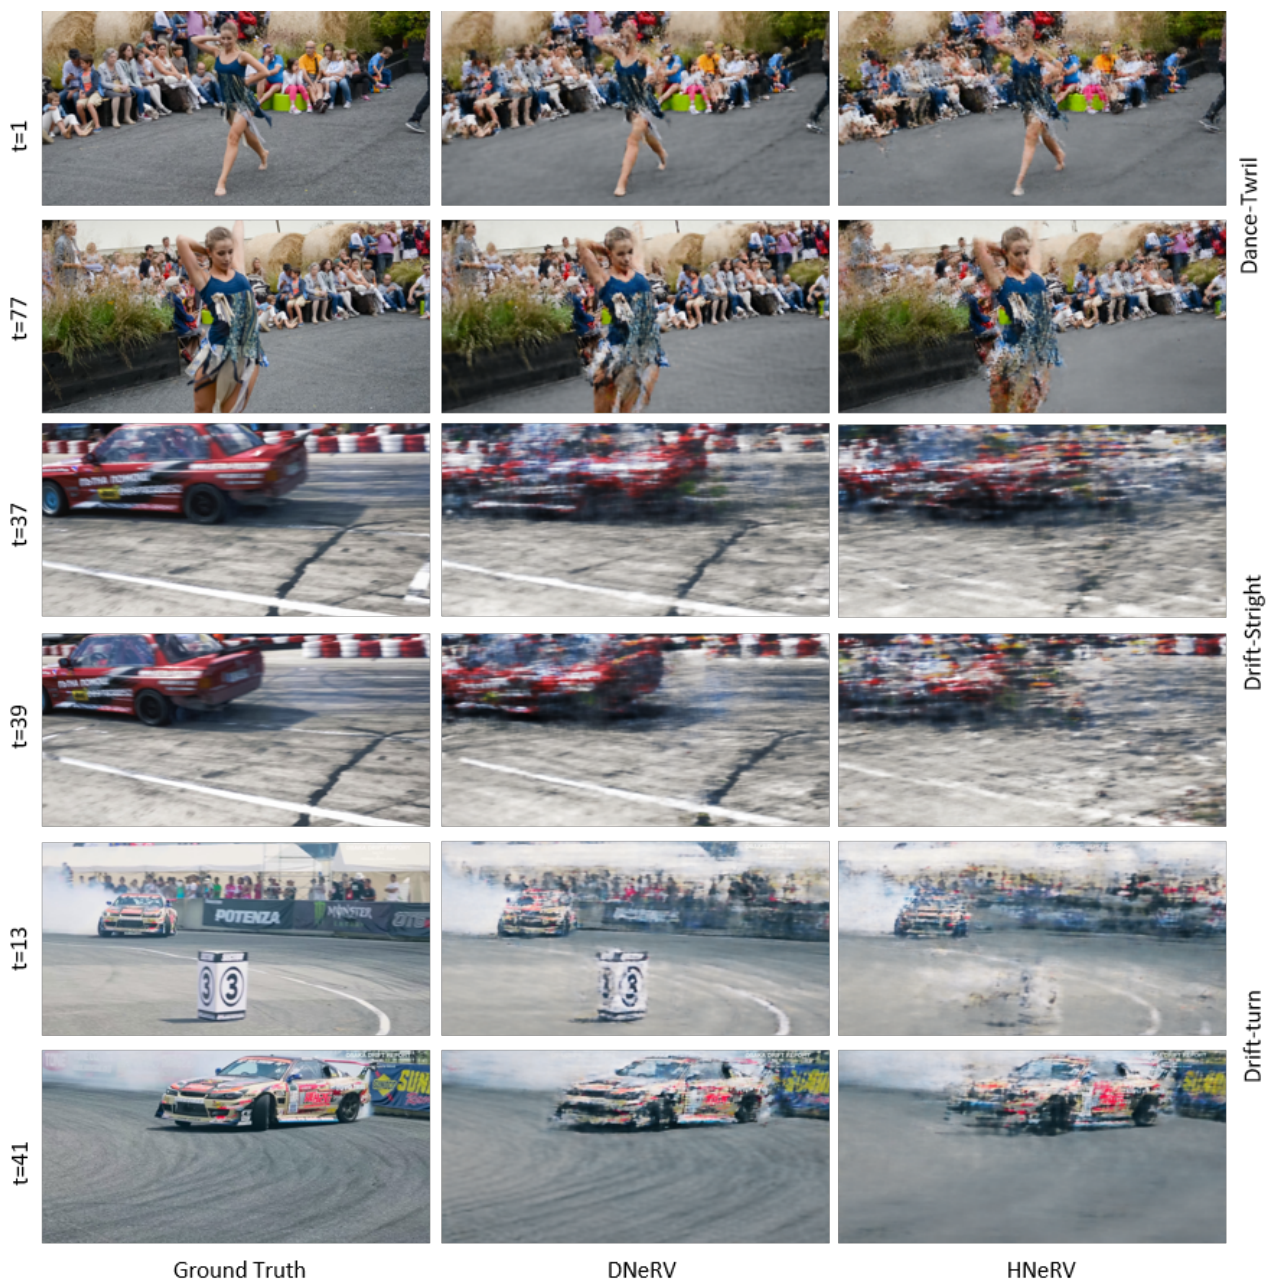

Figure 12. Additional examples for video interpolation on Dance-twirl, Drift-straight and Drift-turn.

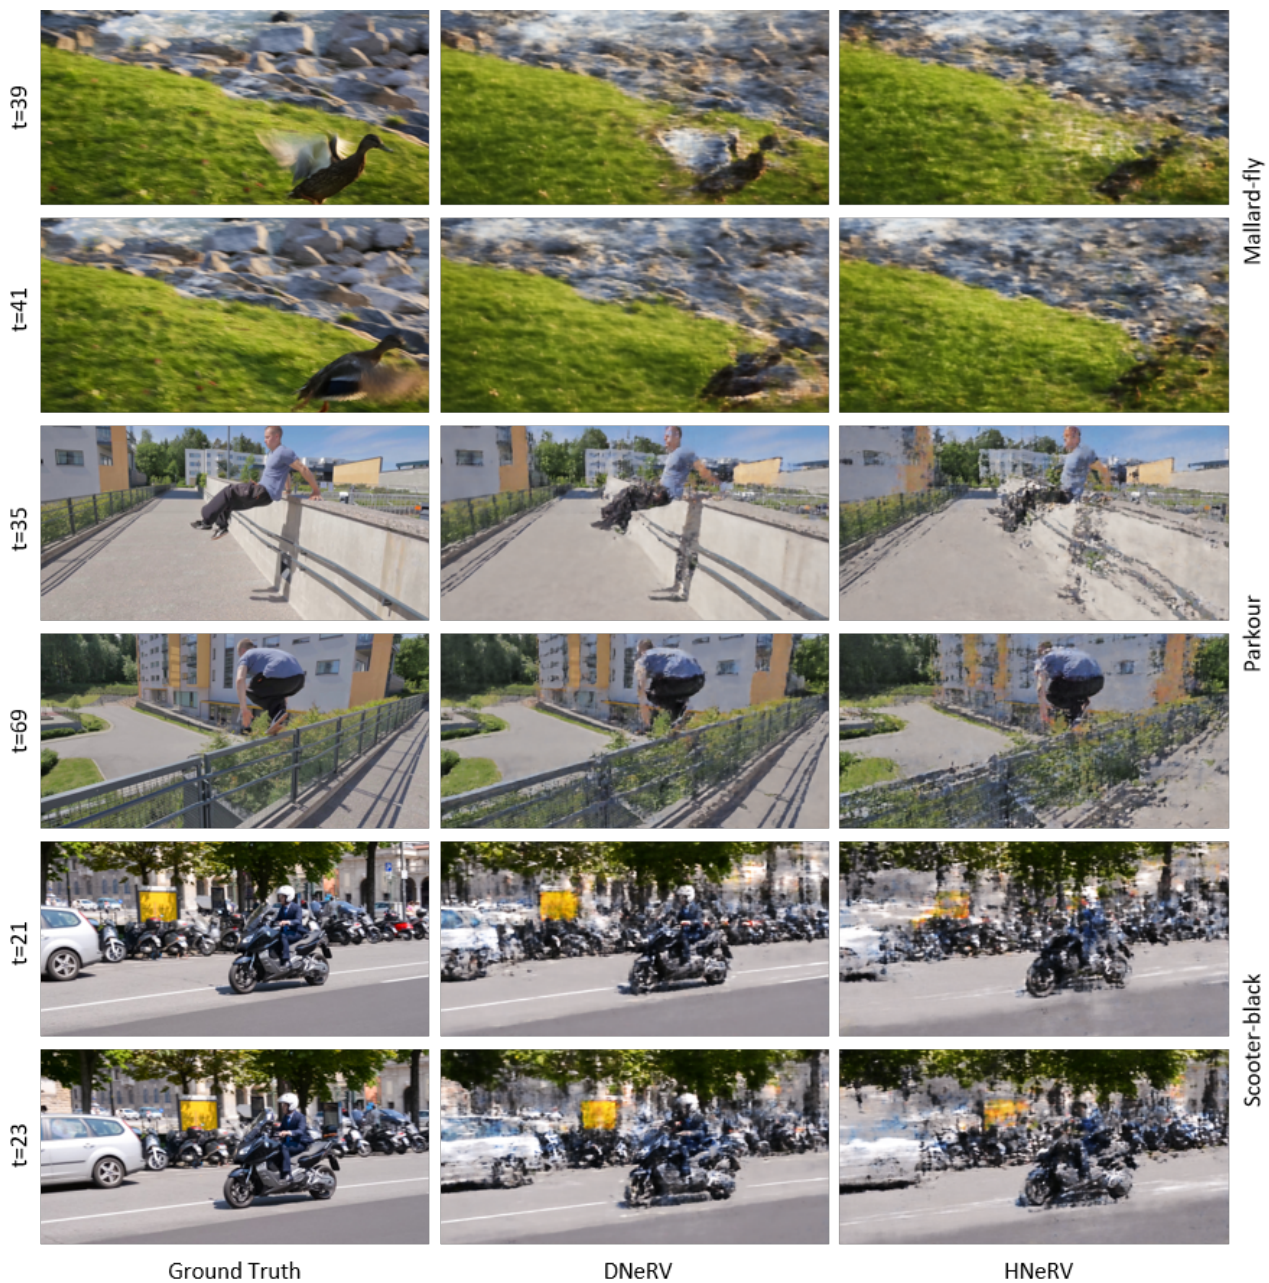

Figure 13. Additional examples for video interpolation on Mallard-fly, Parkour and Scooter-black.



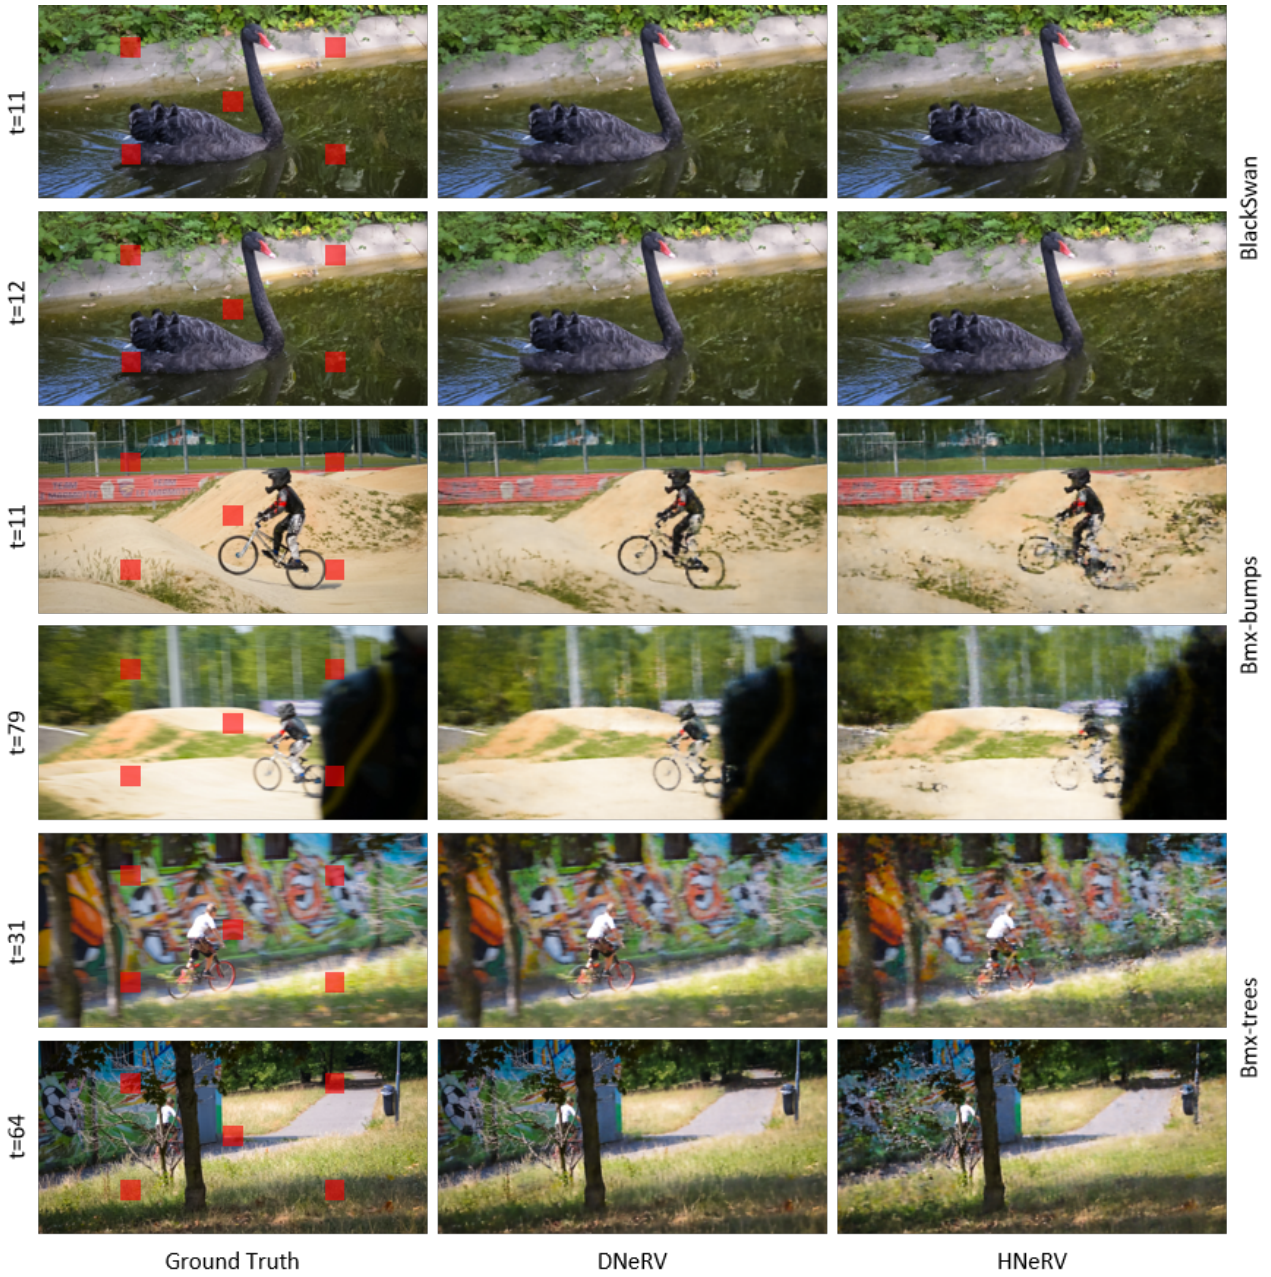

Figure 14. Additional examples for video interpolation on Blackswan, Bmx-bumps and Bmx-trees.



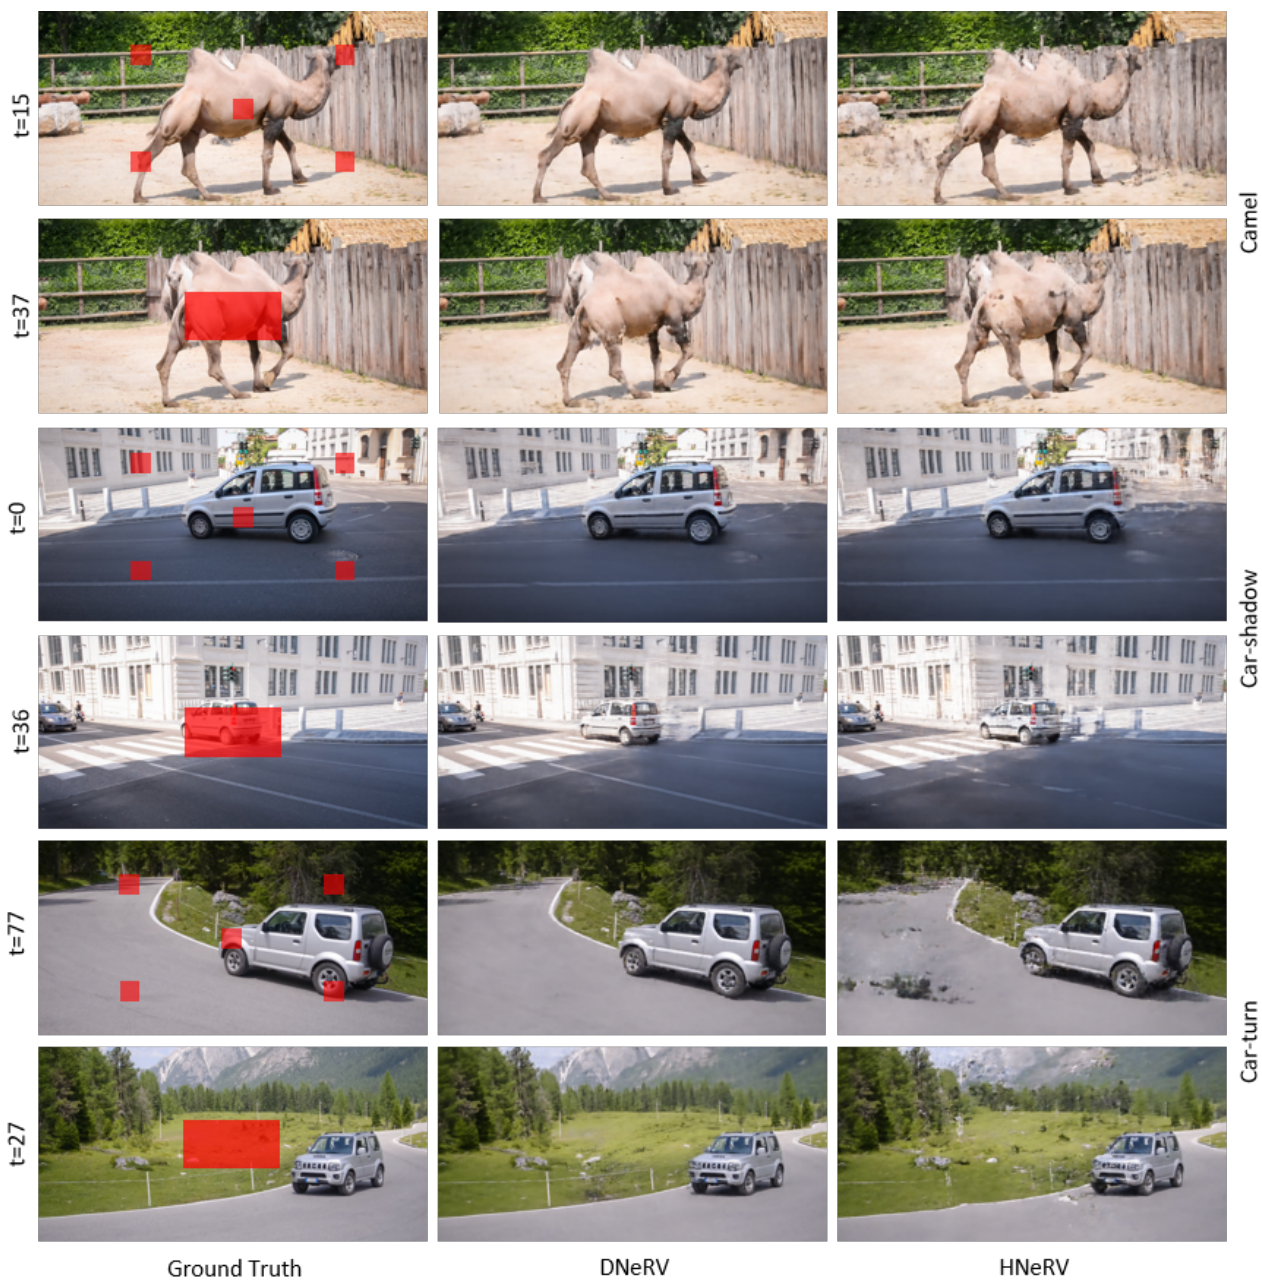

Figure 15. Additional examples for video interpolation on Camel, Car-shadow and Car-turn.



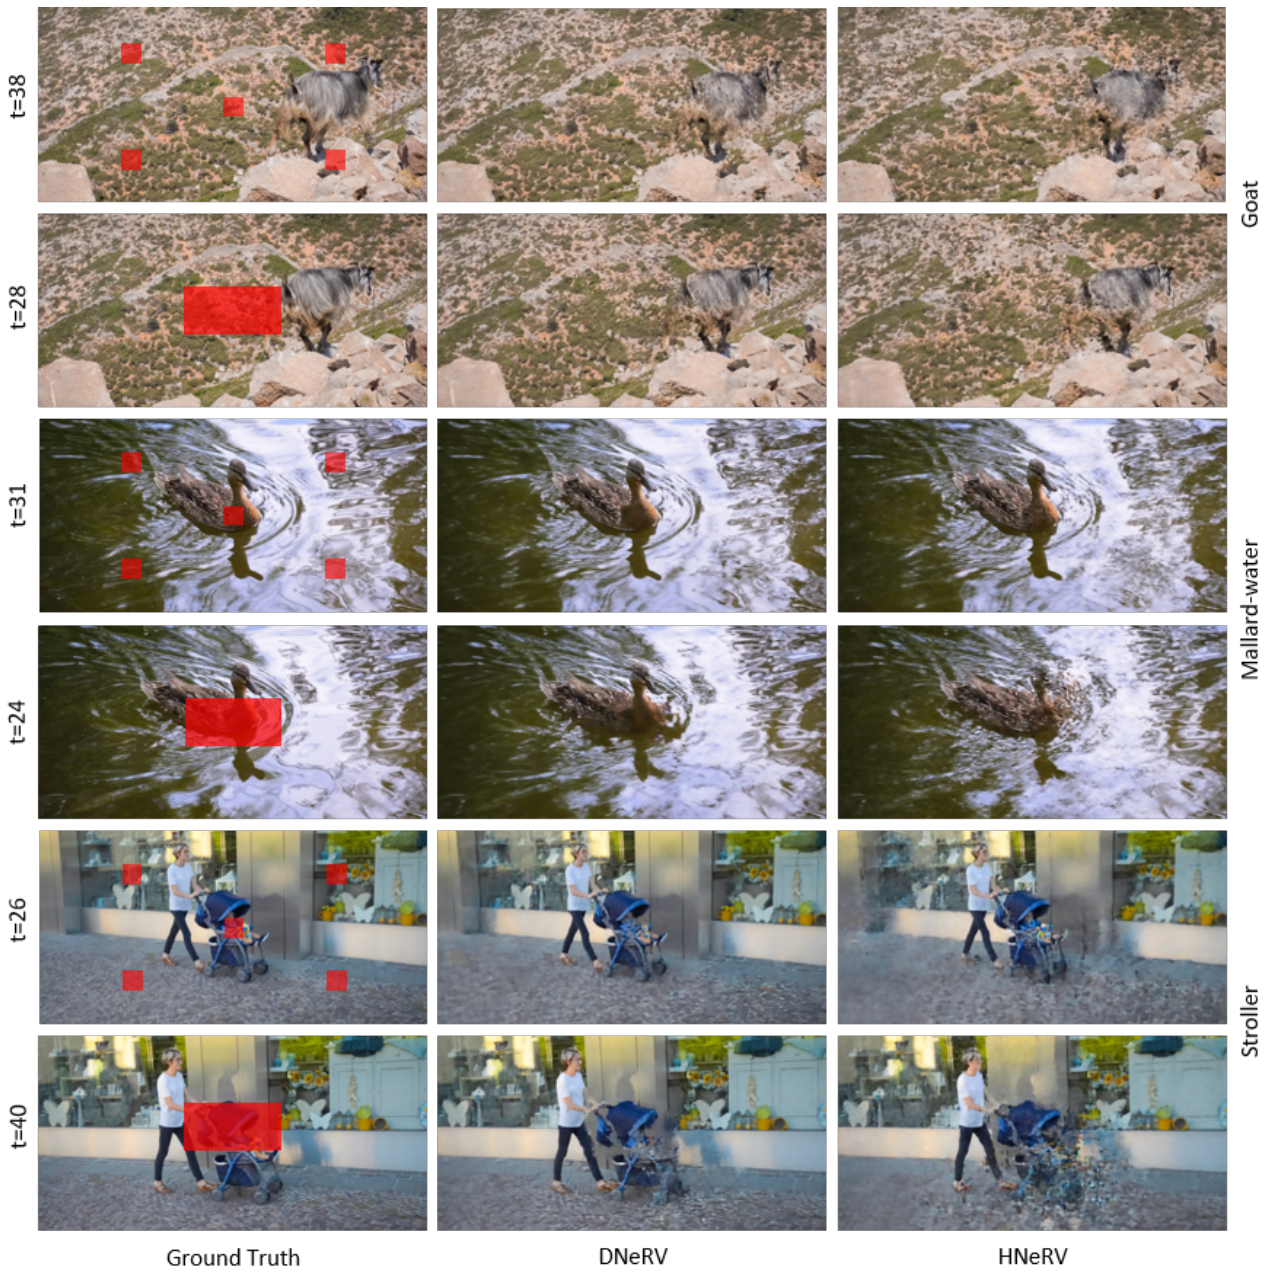

Figure 16. Additional examples for video interpolation on Goat, Mallard-water and Stroller.
